# Supplementary material for: Temporal relationship of sleep apnea and acromegaly: a nationwide study
Source: PubMed Central journal article supplement (PMC6208862; doi:10.1007/s12020-018-1694-1), 2018-07-31
Supplement: 12020_2018_1694_MOESM2_ESM.pdf [file 12020_2018_1694_MOESM2_ESM.pdf]

## **Temporal relationship of sleep apnea and acromegaly: a nationwide study**

### **Endocrine**

Konstantina Vouzouneraki\*, Karl A. Franklin, Maria Forsgren, Maria Wärn, Jenny Tiberg Persson, Helena Wik, Christina Dahlgren, Ann-Sofie Nilsson, Caroline Alkebro, Pia Burman, Eva-Marie Erfurth, Jeanette Wahlberg, Anna-Karin Åkerman, Charlotte Høybye, Oskar Ragnarsson, Britt Edén Engström, Per Dahlqvist

\* Corresponding author, Department of Public Health and Clinical Medicine, Umeå University  
e-mail: [konstantina.vouzouneraki@umu.se](mailto:konstantina.vouzouneraki@umu.se)

### **Online Resource 2 and Online Resource 3**

**Online Resource 2** The questionnaire completed by the patient at the study visit.

## Questionnaire for the patients

Name : \_\_\_\_\_

Personal identification number: \_\_\_\_\_

Date of visit : \_\_\_\_\_

- |                                                        | Yes                        | No                                      | I don't know                       |
|--------------------------------------------------------|----------------------------|-----------------------------------------|------------------------------------|
| 1. Do you snore?                                       | <input type="radio"/>      | <input type="radio"/>                   | <input type="radio"/>              |
| 2. Have you noticed breathing cessations during sleep? | <input type="radio"/>      | <input type="radio"/>                   | <input type="radio"/>              |
| 3. Do you feel rested after a nights sleep?            | <input type="radio"/>      | <input type="radio"/>                   | <input type="radio"/>              |
| 4. Have you ever been investigated for sleep apnea?    | <input type="radio"/>      | <input type="radio"/>                   | <input type="radio"/>              |
| a. If yes, when (year) and where?                      | _____                      |                                         |                                    |
| b. Did the investigation show sleep apnea?             | <input type="radio"/>      | <input type="radio"/>                   | <input type="radio"/>              |
| c. If yes, do you have a treatment for sleep apnea?    | <input type="radio"/> CPAP | <input type="radio"/> mandibular splint | <input type="radio"/> Other: _____ |

**Rate your probability of falling asleep in the following situations:**

**0** = would never doze, **1** = slight chance of dozing, **2** = moderate chance of dozing, **3** = high chance of dozing

- |                                                             | 0                     | 1                     | 2                     | 3                     |
|-------------------------------------------------------------|-----------------------|-----------------------|-----------------------|-----------------------|
| Sitting and reading                                         | <input type="radio"/> | <input type="radio"/> | <input type="radio"/> | <input type="radio"/> |
| Watching TV                                                 | <input type="radio"/> | <input type="radio"/> | <input type="radio"/> | <input type="radio"/> |
| Sitting inactive in a public place (meeting, theatre, etc.) | <input type="radio"/> | <input type="radio"/> | <input type="radio"/> | <input type="radio"/> |
| As a passenger in a car for 1 hour without a break          | <input type="radio"/> | <input type="radio"/> | <input type="radio"/> | <input type="radio"/> |
| Lying down to rest in the afternoon                         | <input type="radio"/> | <input type="radio"/> | <input type="radio"/> | <input type="radio"/> |
| Sitting and talking to someone                              | <input type="radio"/> | <input type="radio"/> | <input type="radio"/> | <input type="radio"/> |
| Sitting quietly after a lunch without alcohol               | <input type="radio"/> | <input type="radio"/> | <input type="radio"/> | <input type="radio"/> |
| In a car, while stopped for a few minutes                   | <input type="radio"/> | <input type="radio"/> | <input type="radio"/> | <input type="radio"/> |

Epworth Sleepiness Scale (ESS)

Score  $\geq 10$  is associated with sleep apnea, lower score does not exclude it. Score: \_\_\_\_\_ points

**Online resource 3.** The questionnaire completed by the patient's treating endocrinologist and nurse during the study.

## Questionnaire for the treating doctor and nurse

Name: \_\_\_\_\_

Personal identification number: \_\_\_\_\_

Patient's identification for the study \_\_\_\_\_

Date of birth: 19\_\_/\_\_/\_\_     Male     Female

Has given written informed consent         No     Yes

Date of acromegaly diagnosis: \_\_\_\_\_

Pituitary surgery                                 No     Yes x1     Yes x2     Yes x>2

Pituitary radiotherapy                         No     Yes

- |                                                                                                                                                                     | Yes/No                   | (year, month) |
|---------------------------------------------------------------------------------------------------------------------------------------------------------------------|--------------------------|---------------|
| • Has the patient had a myocardial infarction?                                                                                                                      | Y / N                    | _____         |
| • Has the patient had a stroke?                                                                                                                                     | Y / N                    | _____         |
| • Is the patient smoking?                                                                                                                                           | Y / never / quitted year | _____         |
| • Current medical treatment for acromegaly?<br><input type="radio"/> Somatostatin analogue <input type="radio"/> Dopamine agonist <input type="radio"/> Pegvisomant | Y / N                    |               |
| • Has the patient current medical treatment for hypertension?                                                                                                       | Y / N                    |               |
| • Has the patient current medical treatment for diabetes?                                                                                                           | Y / N                    |               |
| • Has the patient current medical treatment for angina?                                                                                                             | Y / N                    |               |
| • Has the patient current medical treatment for heart failure?                                                                                                      | Y / N                    |               |

Height \_\_\_\_\_ cm                                Blood pressure (sitting) \_\_\_\_\_/\_\_\_\_\_ mm Hg

Weight \_\_\_\_\_ kg

Waist circumference \_\_\_\_\_ cm                                Right index finger circumference \_\_\_\_\_ mm  
counted with:     rings     tape measure

S-IGF-1 \_\_\_\_\_ µg/l    Reference for age \_\_\_\_\_ µg/l

- Is the patient's acromegaly biochemically controlled?    Yes / No  
(S-IGF-1 in the reference range for age)

• **Referred to sleep investigation:**

- Written referral sent at today's visit.
- No – has previously been investigated for sleep apnea – please see page 1.
- No – very low clinical suspicion for sleep apnea at today's visit.

Is there a referral response from the sleep clinic?                                 No     Yes

Date of investigation \_\_\_\_\_

Other information: \_\_\_\_\_
