# Supplementary material for: Temporal relationship of sleep apnea and acromegaly: a nationwide study
Source: Springer Nature journal article supplement (doi:10.1007/s12020-018-1694-1), 2018-07-31
Supplement: MOESM1 [file 15991666]

## Temporal relationship of sleep apnea and acromegaly: a nationwide study

### Endocrine

Konstantina Vouzouneraki\*, Karl A. Franklin, Maria Forsgren, Maria Wärn, Jenny Tiberg Persson, Helena Wik, Christina Dahlgren, Ann-Sofie Nilsson, Caroline Alkebro, Pia Burman, Eva-Marie Erfurth, Jeanette Wahlberg, Anna-Karin Åkerman, Charlotte Høybye, Oskar Ragnarsson, Britt Edén Engström, Per Dahlqvist

\* Corresponding author, Department of Public Health and Clinical Medicine, Umeå University  
e-mail: [konstantina.vouzouneraki@umu.se](mailto:konstantina.vouzouneraki@umu.se)

**Online Resource 1** Characteristics of 95 patients with newly or previously diagnosed sleep apnea and 164 patients without sleep apnea.

|                                                           | Sleep apnea<br>(n = 95) | No sleep apnea<br>(n = 164) | All (n = 259) |
|-----------------------------------------------------------|-------------------------|-----------------------------|---------------|
| Age in years*                                             | 59 (53–67)              | 58 (45–68)                  | 59 (47–67)    |
| Men, %                                                    | 55                      | 49                          | 51            |
| Current smokers, valid %, n = 255                         | 15                      | 17                          | 16            |
| Current or previous smokers, valid %, n = 255             | 51                      | 46                          | 47            |
| Snoring, valid %, n = 253                                 | 62                      | 43                          | 50            |
| Partner-observed apneas during sleep,<br>valid %, n = 257 | 44                      | 15                          | 26            |
| BMI*, kg/m <sup>2</sup>                                   | 30<br>(27–34)           | 26<br>(24–30)               | 28<br>(25–32) |
| BMI <25 kg/m <sup>2</sup> , valid %, n = 258              | 16                      | 36                          | 29            |
| BMI 25–30 kg/m <sup>2</sup> , valid %, n = 258            | 36                      | 38                          | 37            |
| BMI >30 kg/m <sup>2</sup> , valid %, n = 258              | 48                      | 26                          | 34            |
| Waist circumference*, cm                                  | 104                     | 95                          | 98            |

|                                                  |                   |                   |                   |
|--------------------------------------------------|-------------------|-------------------|-------------------|
|                                                  | (92–113)          | (86–104)          | (87–109)          |
| S-IGF-1, % of ULN *                              | 86<br>(66–120)    | 78<br>(63–104)    | 82<br>(63–109)    |
| S-IGF-1 ≤ULN, valid %, n = 258                   | 64                | 71                | 69                |
| S-IGF-1 in the highest quartile (Q4), %          | 33                | 20                | 25                |
| Hypertension, current treatment, %               | 53                | 46                | 48                |
| Diabetes, current treatment, %                   | 8.4               | 8.5               | 8.5               |
| Heart failure, current treatment, valid% n = 258 | 0                 | 1.8               | 1.2               |
| Angina Pectoris, current treatment, %            | 1.1               | 0.6               | 0.8               |
| Myocardial infarction, previous, %               | 1.1               | 1.2               | 1.2               |
| Stroke or TIA, previous, %                       | 3.2               | 6.7               | 5.4               |
| Index finger circumference*, mm                  | 75<br>(69–81)     | 71<br>(68–79)     | 74<br>(68–80)     |
| Years since acromegaly diagnosis*                | 6.5<br>(2.9–12.5) | 8.4<br>(4.0–14.7) | 7.7<br>(3.6–13.7) |
| Pituitary surgery, %                             | 85                | 92                | 89                |
| Pituitary radiotherapy, %                        | 18                | 18                | 18                |
| Current medical therapy for acromegaly, %        | 37                | 27                | 31                |
| Somatostatin analogue, %                         | 34                | 23                | 27                |
| Dopamine agonist, %                              | 2.1               | 3.7               | 3.1               |
| Pegvisomant, %                                   | 8.4               | 7.9               | 8.1               |

\* median (25th–75th percentile)
